# Supplementary material for: Induction of Autophagy by Extract from Corydalis heterocarpa for Skin Anti-Aging
Source: MDPI journal article supplement (doi:10.3390/md22030127), 2024-03-08
Supplement: s1 [file s1]

## [Supplementary Information]

### **Induction of autophagy by extract from *Corydalis heterocarpa* for skin anti-aging**

Kyeong Eun Yang<sup>1</sup>, Soo-Bin Nam<sup>1,2</sup>, Ga-Eun Lee<sup>2</sup>, Gabsik Yang<sup>3</sup>, Mee-Hyun Lee<sup>4</sup>, Geul Bang<sup>5</sup>, Jung Hoon Choi<sup>5</sup>, Yong-Yeon Cho<sup>2</sup>, Cheol-Jung Lee<sup>1\*</sup>

<sup>1</sup> Biopharmaceutical research center, Ochang Institute of Biological and Environmental Science, Korea Basic Science Institute (KBSI), Cheongju 28119, Republic of Korea.

<sup>2</sup> College of Pharmacy, The Catholic University of Korea, Bucheon 14662, Republic of Korea

<sup>3</sup> Department of Korean Medicine, College of Korean Medicine, Woosuk University, Jeonju 54986, Republic of Korea.

<sup>4</sup> College of Korean Medicine, Dongshin University, Naju 58245, Republic of Korea.

<sup>5</sup> Digital omics research center, Ochang Institute of Biological and Environmental Science, Korea Basic Science Institute (KBSI), Cheongju 28119, Republic of Korea.

\*Corresponding Authors: Cheol-Jung Lee, Ph. D., E-mail: [veritas0613@kbsi.re.kr](mailto:veritas0613@kbsi.re.kr)

#### **Content**

1. Supplementary Figure

3. Supplementary Table

## Supplementary Figure

**Supplementary Figure S1.** High resolution liquid chromatograph-mass spectrometer (HR LC-MS) profile of *C. heterocarpa* extract.

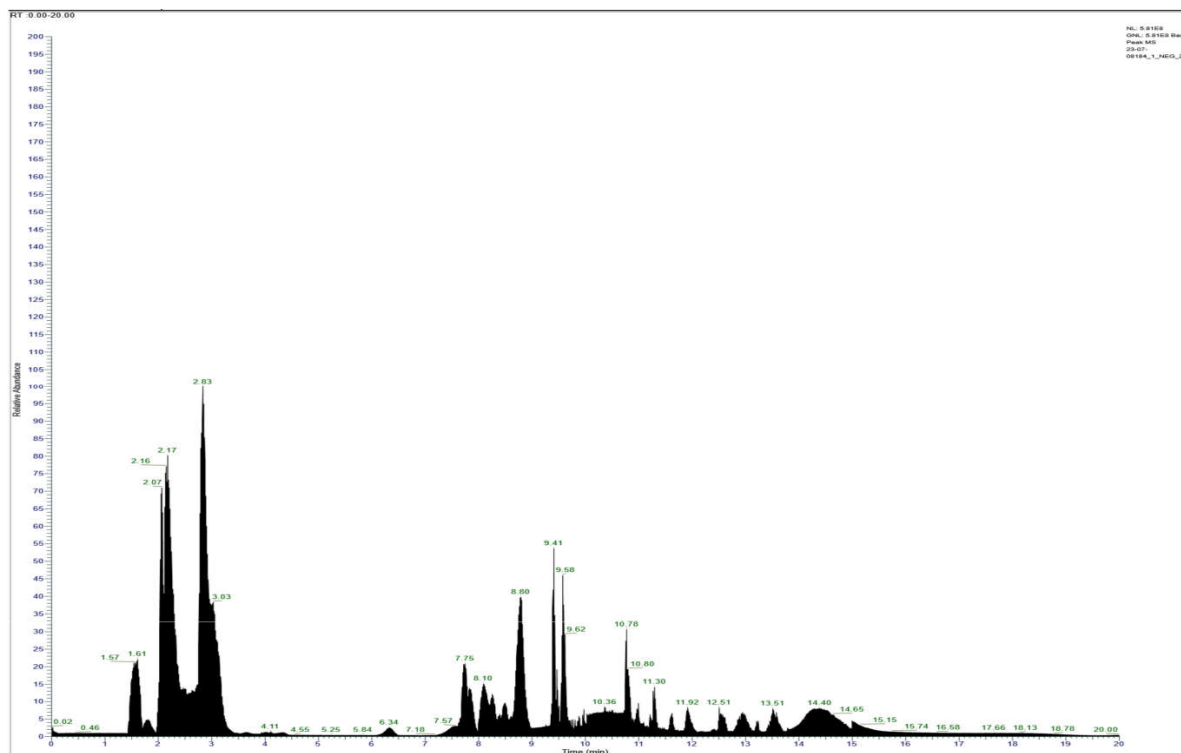

## Supplementary Table

**Supplementary Table S1.** List of target genes involved in *C. heterocarpa* extract-regulated autophagy

|                                                                       | Normalized Data (log2) n=3 |           |           |       |       |       |
|-----------------------------------------------------------------------|----------------------------|-----------|-----------|-------|-------|-------|
|                                                                       | control-1                  | control-2 | control-2 | CH-1  | CH-2  | CH-3  |
| LRSAM1<br>(Leucine Rich Repeat And Sterile Alpha Motif Containing 1)  | 4.335                      | 3.992     | 4.219     | 4.893 | 5.309 | 4.783 |
| PIP4K2B<br>(Phosphatidylinositol-5-phosphate 4-kinase type-2 beta)    | 6.198                      | 6.109     | 6.210     | 6.556 | 6.577 | 6.364 |
| GABARAPL1<br>(GABA Type A Receptor Associated Protein Like 1)         | 7.916                      | 8.122     | 7.982     | 8.143 | 8.348 | 8.293 |
| DAP<br>(Death-associated protein)                                     | 8.085                      | 8.152     | 8.112     | 8.005 | 8.017 | 8.009 |
| RAB7A<br>(Ras-Related Protein Rab-7a)                                 | 8.551                      | 8.497     | 8.555     | 8.318 | 8.423 | 8.297 |
| RAB1A<br>(Ras-Related Protein Rab-1a)                                 | 7.625                      | 7.659     | 7.760     | 7.487 | 7.399 | 7.523 |
| ATG13<br>(Autophagy Related 13)                                       | 5.727                      | 5.865     | 5.665     | 5.464 | 5.589 | 5.405 |
| MAP1LC3B<br>(Microtubule Associated Protein 1 Light Chain 3 Beta)     | 7.928                      | 7.858     | 7.817     | 7.628 | 7.427 | 7.652 |
| VHL<br>(Von Hippel-Lindau Tumor Suppressor)                           | 6.104                      | 5.999     | 5.873     | 5.777 | 5.638 | 5.672 |
| VAMP7<br>(Vesicle Associated Membrane Protein 7)                      | 3.658                      | 3.469     | 3.442     | 2.990 | 3.281 | 2.885 |
| CHMP1A<br>(Charged Multivesicular Body Protein 1A)                    | 6.603                      | 6.588     | 6.484     | 6.001 | 5.912 | 6.047 |
| OGT<br>(O-Linked N-Acetylglucosamine (GlcNAc) Transferase)            | 4.979                      | 5.033     | 5.300     | 4.729 | 4.550 | 4.304 |
| HGS<br>(Hepatocyte Growth Factor-Regulated Tyrosine Kinase Substrate) | 6.842                      | 7.189     | 6.984     | 6.417 | 6.224 | 6.381 |

**Supplementary Table S2.** Chemical composition of *C. heterocarpa* extract using HR LC-MS analysis methods

| Compounds                                                       | Retention Time (min) | Molecular Weight |
|-----------------------------------------------------------------|----------------------|------------------|
| 2-Furoic acid                                                   | 2.17                 | 112.015          |
| Citric acid                                                     | 2.83                 | 192.026          |
| Tectoridin                                                      | 2.89                 | 462.114          |
| Filgotinib                                                      | 3.03                 | 425.152          |
| Esculin                                                         | 7.74                 | 340.078          |
| Methoxy-myricetin-3-O-hexosyl-7-Odeoxyhexosyl(1-2)deoxyhexoside | 8.14                 | 786.220          |
| Rutin                                                           | 8.26                 | 610.152          |
| Quercetin-3- $\beta$ -D-glucoside                               | 8.38                 | 464.094          |
| Cribrarione A                                                   | 8.64                 | 278.042          |
| Divirensol A                                                    | 9.40                 | 578.273          |
| Corchorifatty acid F                                            | 9.41                 | 328.224          |
| Perfluorobutanoic acid                                          | 9.58                 | 213.985          |
| Inotilone                                                       | 9.62                 | 218.057          |
| SuncheonosideA                                                  | 11.3                 | 400.154          |
